# Supplementary material for: “Synergistic effect” based novel and ultrasensitive approach for the detection of serotonin using DEM-modulated bimetallic nanosheets
Source: Royal Society of Chemistry journal article supplement (doi:10.1039/d3tb00572k), 2023-01-01
Supplement: d3tb00572k1.pdf [file d3tb00572k1.pdf]

1

## Supporting Information

2 **“Synergistic Effect” based novel and ultrasensitive approach for the**  
3 **detection of serotonin using DEM modulated bimetallic nanosheets**

4 Deepak Dabur<sup>a</sup>, Nallin Sharma<sup>b</sup>, Hui-Fen Wu<sup>\*a, b, c, d, e</sup>

5 <sup>a</sup>International PhD program for Science, National Sun Yat-Sen University, Kaohsiung,  
6 80424, Taiwan

7 <sup>b</sup>Department of Chemistry, National Sun Yat-Sen University, Kaohsiung, 70, Lien-Hai  
8 Road, Kaohsiung, 80424, Taiwan

9 <sup>c</sup>School of Pharmacy, College of Pharmacy, Kaohsiung Medical University,  
10 Kaohsiung, 807, Taiwan

11 <sup>d</sup>Institute of Medical Science and Technology, College of Medicine, National Sun Yat-  
12 Sen University, Kaohsiung, 80424, Taiwan

13 <sup>e</sup>Institute of Precision Medicine, College of Medicine, National Sun Yat-Sen  
14 University, Kaohsiung, 80424, Taiwan

15

16 \*Corresponding author, Phone: +886-7-5252000-3955; Fax: +886-7-5253909

17 Email: [hwu@faculty.nsysu.edu.tw](mailto:hwu@faculty.nsysu.edu.tw) (Prof H.-F. Wu)

---

18

19

20

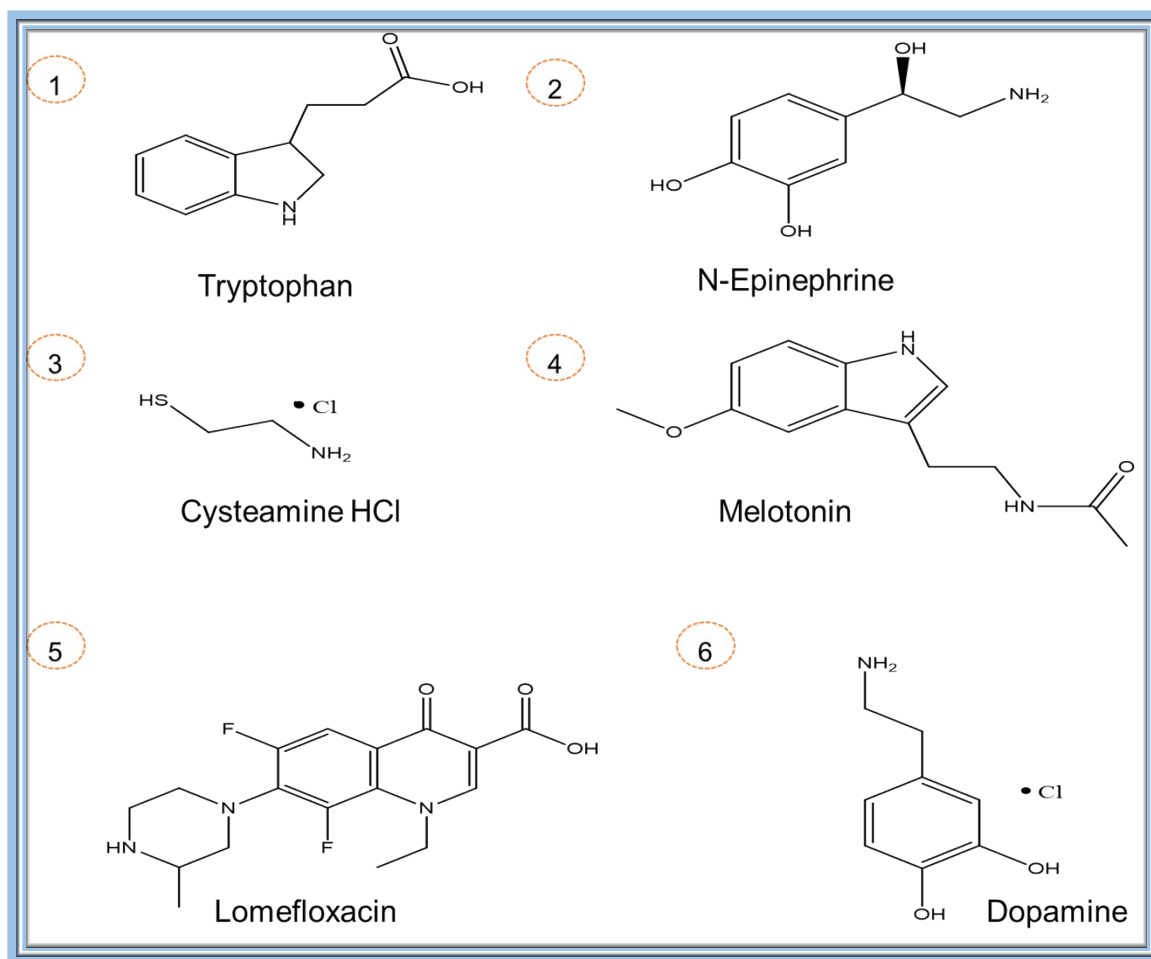

21

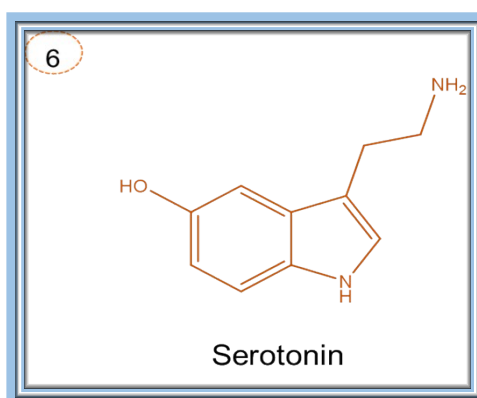

22

23 **Figure S1.** Chemical structure of monoamines and neurotransmitters used in this study.

24

25

26

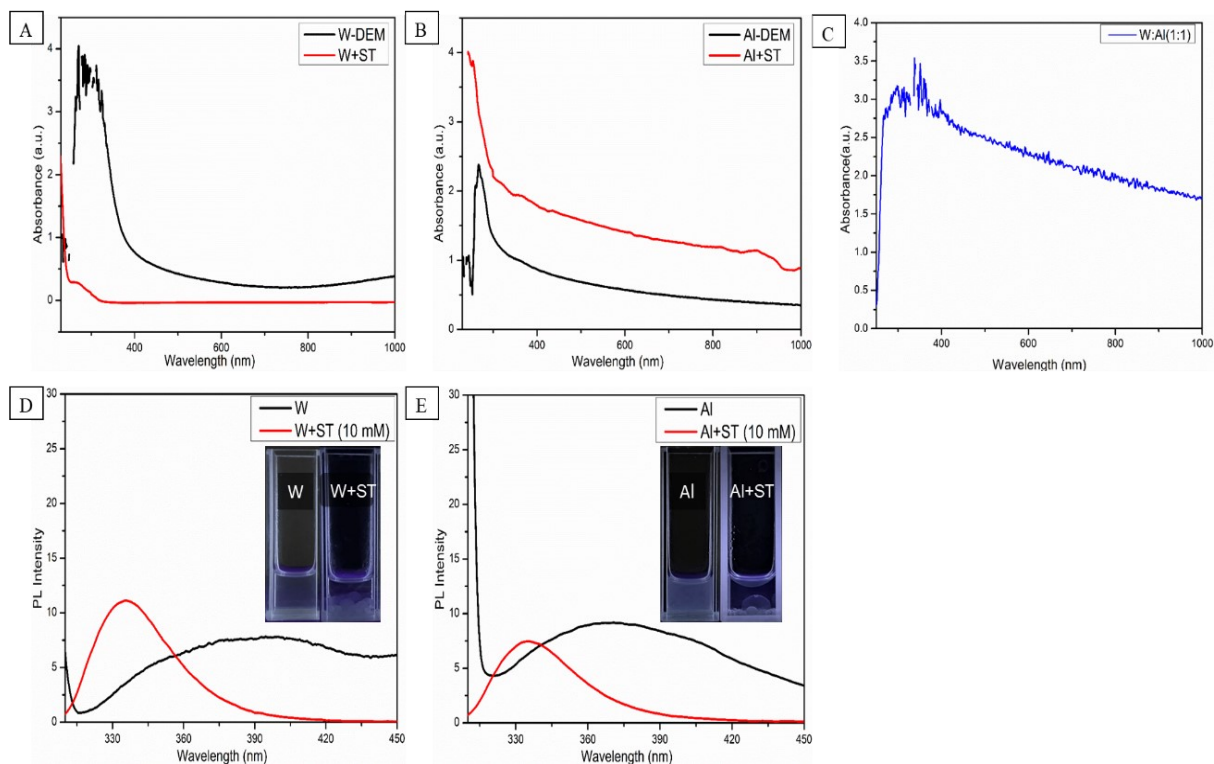

27

28 **Figure S2.** UV absorption studies (A) for only W and W with ST (B) only Al and Al  
 29 with ST (C) W-Al with 1:1 ratio. PL spectra for (D) only W (DEM) and W (DEM) with  
 30 ST (E) only Al (DEM) and Al (DEM) with ST

31

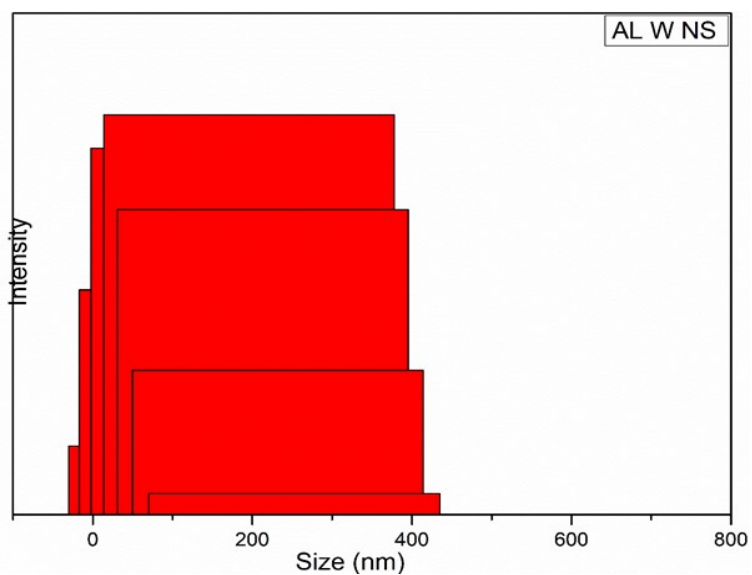

32

33 **Figure S3.** DLS size of newly synthesized Al-W nanosheets.

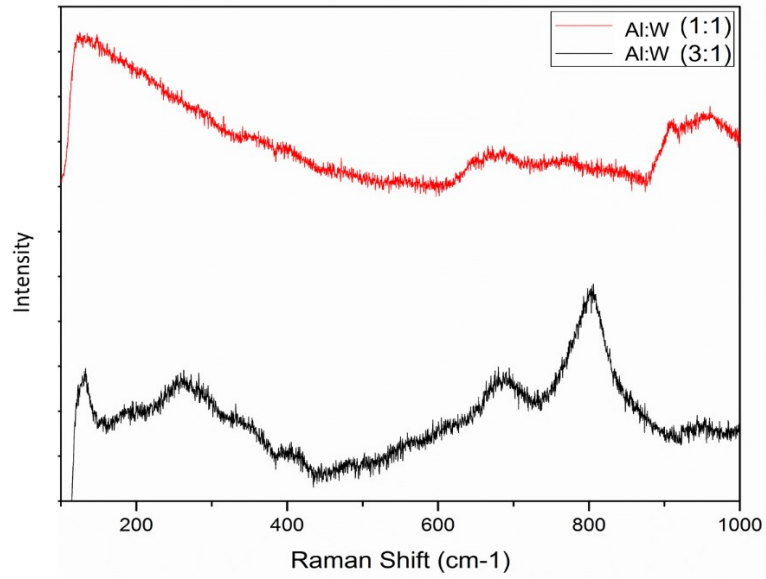

34

35 **Figure S4.** Raman studies of different ratio of moles of Al and W to synthesize Al-W  
 36 nanosheets.

37

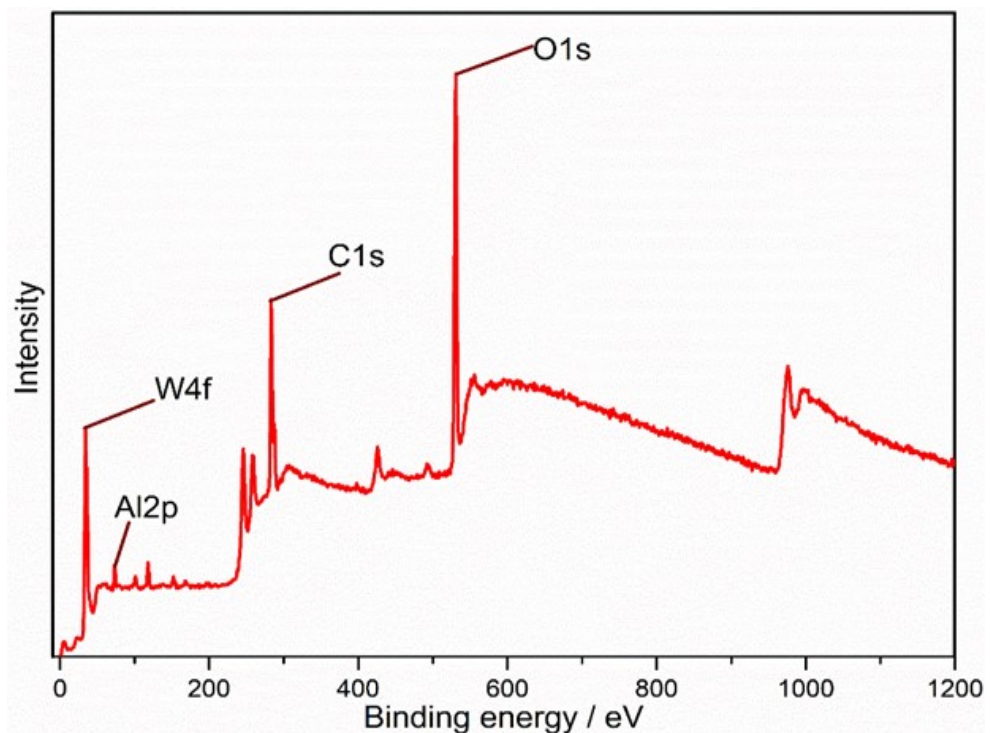

38

39 **Figure S5.** XPS Survey Scan of Al-W nanosheets.

40

41

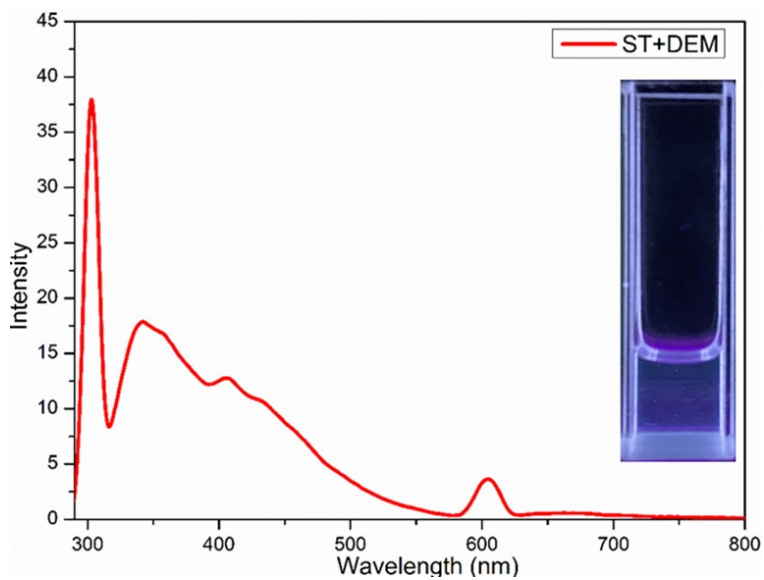

42

43 **Figure S6.** Fluorescence spectra for the control studies of Serotonin in DEM Solvent.

44

45

46

47

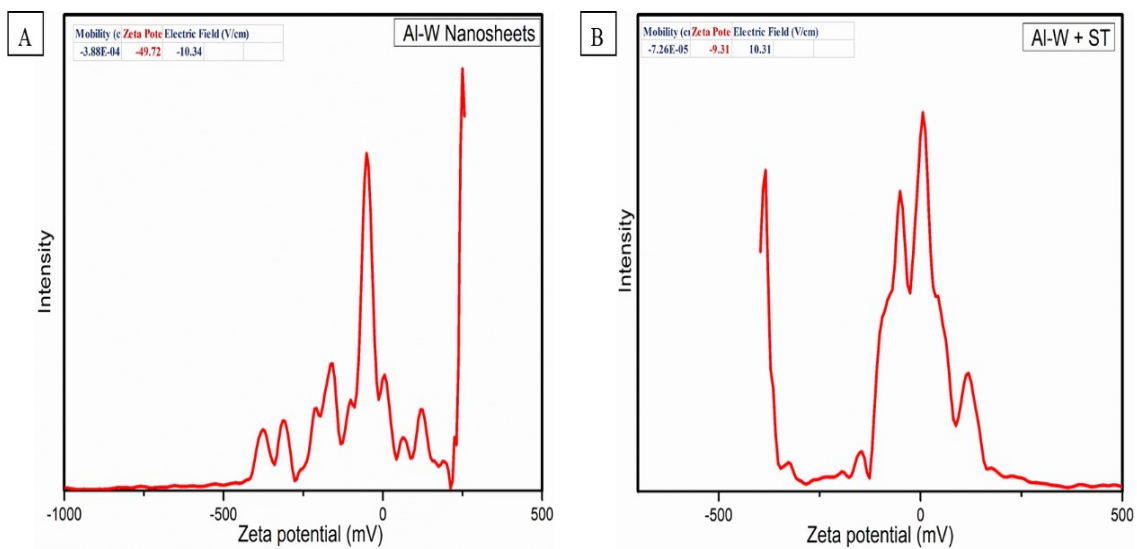

48

49 **Figure S7.** Zeta potential studies (A) for Al-W nanosheets (B) and Al-W+ST.

51 **Table S1.** Comparative studies between previous methods and developed method for  
 52 the detection of Serotonin

| Analyte                                                                   | Probe | Linear range        | Method       | LOD          | Ref       |
|---------------------------------------------------------------------------|-------|---------------------|--------------|--------------|-----------|
| <b>Ln-MOF</b>                                                             | ST    | 1.9 - 270 $\mu$ M   | PL           | 0.66 $\mu$ M | [1]       |
| <b>EuUPDC</b>                                                             | ST    | 0.05 - 6.54 $\mu$ M | PL           | 0.05 $\mu$ M | [2]       |
| <b>Ti3C2Tx-reduced graphene oxide</b>                                     | ST    | 0.025-147 $\mu$ M   | EC           | 10 nM        | [3]       |
| <b>Tb3p-NOTT-220</b>                                                      | ST    | 0–200 $\mu$ M       | PL           | 0.57 $\mu$ M | [4]       |
| <b>Mn-doped zinc sulphide (ZnS) QDs@SiO2@MIPs</b>                         | ST    | 50 to 500 ng/ml,]   | PL           | 0.69 ng/ml   | [5]       |
| <b>3,3-dithio-bis-(sulfosuccinimidyl)propionate (DTSP) modified AuNPs</b> | ST    | 100-300 nM          | Colorimetric | 2.6 nM       | [6]       |
| <b>PEDOTNTs/rGO/Ag NPs</b>                                                | ST    | 1-0.5 mM            | transducer   | 0.1 nM       | [7]       |
| <b>Al-W Nanosheets</b>                                                    | ST    | 10nm-1mM            | PL           | 0.05nM       | This work |

55 **Table S2.** Comparison of previous literature with the new developed method for the  
 56 real sample analysis for serotonin

| Analyte                                                           | Probe     | Linear range         | Method    | LOD           | Sample                                   | Ref                  |
|-------------------------------------------------------------------|-----------|----------------------|-----------|---------------|------------------------------------------|----------------------|
| QDs@SiO <sub>2</sub> @MIPs                                        | 5-HT      | 50 -500<br>ng/mL     | PL        | 0.69<br>ng/mL | Human<br>serum                           | [5]                  |
| AuNPS                                                             | 5-HT      | 0-3 μM               | PL        | 0.12 nM       | Human<br>serum                           | [8]                  |
| Tf-Au NCs                                                         | 5-HT      | 0.2 -50<br>μM        | PL        | 0.049μM       | Human<br>serum                           | [9]                  |
| Pt coated carbon<br>modified GCE                                  | 5-HIAA    | 0.01–<br>100 μM      | GCE       | 20 nM         | Urine                                    | [10]                 |
| AuAg nanoalloy-<br>graphene<br>nanosheets                         | ST        | 2.7 nM-<br>4.82 μM   | GCE       | 1.6 nM        | Blood<br>serum                           | [11]                 |
| Fe <sub>3</sub> O <sub>4</sub> @Au@SiO <sub>2</sub><br>coated MIP | ST        | 0.01–<br>1000 μM     | LSV       | 0.002<br>μM a | Urine                                    | [12]                 |
| <b>Al-W Nanosheets</b>                                            | <b>ST</b> | <b>10nm-<br/>1mM</b> | <b>PL</b> | <b>0.05nM</b> | <b>Urine<br/>and<br/>Blood<br/>serum</b> | <b>This<br/>work</b> |

58

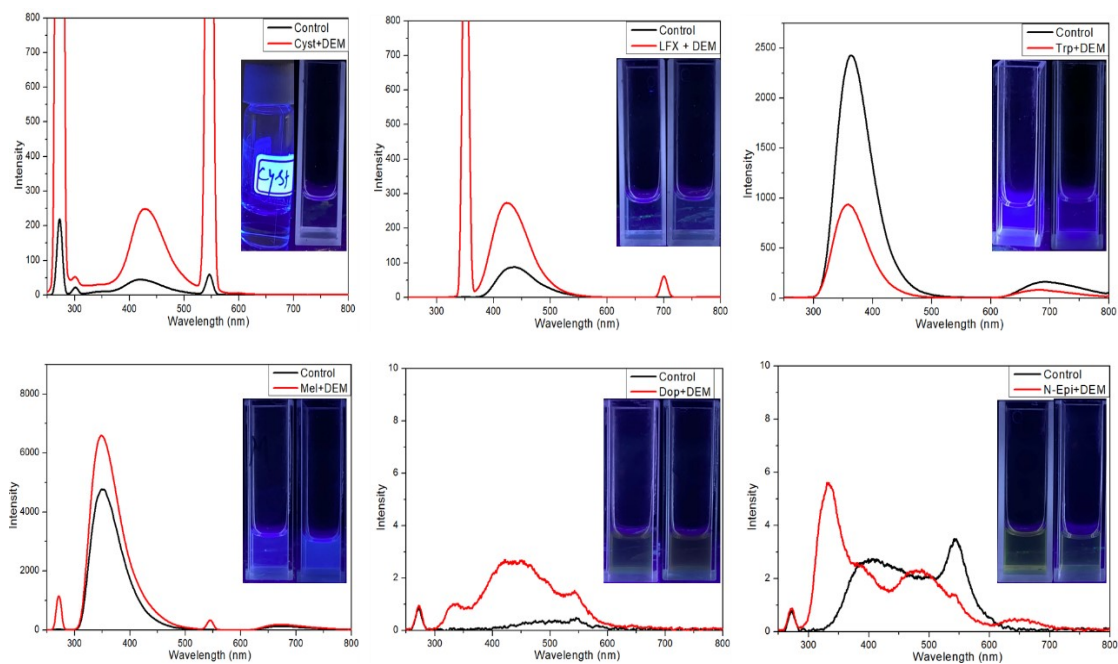

59

60 **Figure S8.** PL Emission studies for different neurotransmitters.

61

| <b>Sample</b>      | <b>Concentration of ST (uM)</b> | <b>Recovery (%)</b> |
|--------------------|---------------------------------|---------------------|
| <b>Human Urine</b> | <b>0.5</b>                      | <b>104.12</b>       |
|                    | <b>1</b>                        | <b>99.91</b>        |
|                    | <b>5</b>                        | <b>90.4</b>         |
|                    | <b>10</b>                       | <b>94</b>           |
| <b>Blood Serum</b> | <b>0.5</b>                      | <b>102.82</b>       |
|                    | <b>1</b>                        | <b>108.34</b>       |
|                    | <b>5</b>                        | <b>100.25</b>       |
|                    | <b>10</b>                       | <b>106.66</b>       |

62

63 **Figure S9.** Recovery results of biosensor in real samples.

64

65

66



## 67 References

- 68 1. Wu, S., et al., *Rapid detection of the biomarkers for carcinoid tumors by a water*  
69 *stable luminescent lanthanide metal–organic framework sensor*. *Advanced*  
70 *Functional Materials*, 2018. **28**(17): p. 1707169.
- 71 2. Zhong, Y.-F., et al., *Highly selective and sensitive fluorescent biosensor for the*  
72 *detection of serotonin and its metabolite by Eu<sup>3+</sup>-Doped Metal-Organic*  
73 *framework*. *Chemical Engineering Journal*, 2022. **442**: p. 136272.
- 74 3. Su, M., et al., *Ti<sub>3</sub>C<sub>2</sub>T<sub>x</sub>-reduced graphene oxide nanocomposite-based*  
75 *electrochemical sensor for serotonin in human biofluids*. *Sensors and Actuators*  
76 *B: Chemical*, 2022. **367**: p. 132019.
- 77 4. Song, L., F. Tian, and Z. Liu, *Lanthanide doped metal-organic frameworks as a*  
78 *ratiometric fluorescence biosensor for visual and ultrasensitive detection of*  
79 *serotonin*. *Journal of Solid State Chemistry*, 2022. **312**: p. 123231.
- 80 5. Wang, Z., et al., *Mn<sup>2+</sup> doped ZnS QDs modified fluorescence sensor based on*  
81 *molecularly imprinted polymer/sol-gel chemistry for detection of Serotonin*.  
82 *Talanta*, 2018. **190**: p. 1-8.
- 83 6. Chavan, S.G., et al., *Dimeric-serotonin bivalent ligands induced gold*  
84 *nanoparticle aggregation for highly sensitive and selective serotonin biosensor*.  
85 *Biosensors and Bioelectronics*, 2021. **191**: p. 113447.
- 86 7. Sadanandhan, N.K., et al., *PEDOT-reduced graphene oxide-silver hybrid*  
87 *nanocomposite modified transducer for the detection of serotonin*. *Journal of*  
88 *Electroanalytical Chemistry*, 2017. **794**: p. 244-253.
- 89 8. Godoy-Reyes, T.M., et al., *Selective and sensitive colorimetric detection of the*  
90 *neurotransmitter serotonin based on the aggregation of bifunctionalised gold*  
91 *nanoparticles*. *Sensors and Actuators B: Chemical*, 2018. **258**: p. 829-835.
- 92 9. Sha, Q., et al., *A fluorescence turn-on biosensor based on transferrin*  
93 *encapsulated gold nanoclusters for 5-hydroxytryptamine detection*. *Sensors and*  
94 *Actuators B: Chemical*, 2019. **294**: p. 177-184.
- 95 10. Fredj, Z., et al., *Simultaneous voltammetric detection of 5-hydroxyindole-3-*  
96 *acetic acid and 5-hydroxytryptamine using a glassy carbon electrode modified*  
97 *with conducting polymer and platinised carbon nanofibers*. *Microchimica Acta*,  
98 2018. **185**: p. 1-10.
- 99 11. Dilley, R.J. and W.A. Morrison, *Vascularisation to improve translational*  
100 *potential of tissue engineering systems for cardiac repair*. *The international*  
101 *journal of biochemistry & cell biology*, 2014. **56**: p. 38-46.
- 102 12. Amatongchai, M., et al., *Highly sensitive and selective electrochemical paper-*  
103 *based device using a graphite screen-printed electrode modified with*

104      *molecularly imprinted polymers coated Fe<sub>3</sub>O<sub>4</sub>@ Au@ SiO<sub>2</sub> for serotonin*  
105      *determination. Analytica chimica acta, 2019. 1077: p. 255-265.*

106
